# Supplementary material
Source: PubMed Central journal article supplement (PMC4876695)
Supplement: NIHMS787516-supplement-Supplemental_Figure_1.pdf [file NIHMS787516-supplement-Supplemental_Figure_1.pdf]

## Supplementary Figure S1

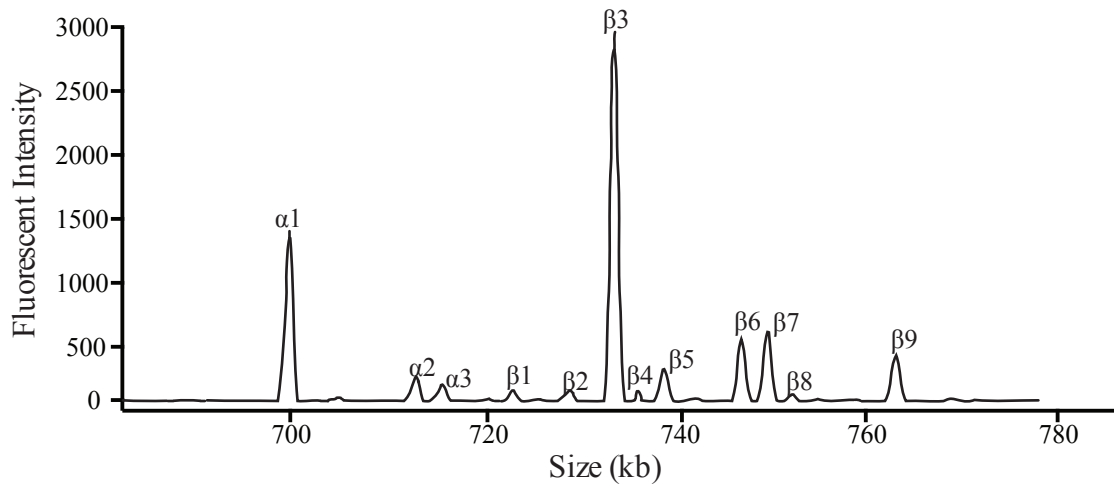

Supplementary Figure S1: Quantification of *TNNT3* splice forms. A representative trace of the fluorescently labeled PCR amplicons corresponding to the 12 *TNNT3* splice forms in the gastrocnemius muscle of a 2-month old rat as determined by capillary electrophoresis is shown. The fluorescent intensity for a particular splice form, i.e. the peak height, as determined using Peak Scanner software, is an indicator of the abundance of that splice form.
